# Supplementary material for: Compatibility of insecticides and fungicides with the zoophytophagous mirid predator Nesidiocoris tenuis
Source: PLoS One. 2017 Nov 2;12(11):e0187439. doi: 10.1371/journal.pone.0187439 (PMC5667899; doi:10.1371/journal.pone.0187439)
Supplement: S1 Dataset — (XLSX) [file pone.0187439.s001.xlsx]

## Sheet: residual exposure
			%Mortality	progeny	reproductive Capacity	reduction coefficient E%
1	Control	1	30	201	40.2
	Control	2	20	131	27.7879
	Control	3	20	129	30.1
	Control	4	30	139	34.75
	Control	5	30	160	35
2	Pyriproxyfen	1	30	87	21	40.8213
	Pyriproxyfen	2	40	100	43.75	-5.6763
	Pyriproxyfen	3	50	125	48.6111	2.15157
	Pyriproxyfen	4	20	49	11.0645	64.3655
	Pyriproxyfen	5	50	109	29.3462	40.9297
3	Spirotetramat	1	30	127	34.1923	3.64489
	Spirotetramat	2	30	150	37.5	-5.6763
	Spirotetramat	3	40	203	49	-18.3575
	Spirotetramat	4	30	114	27.5172	22.4555
	Spirotetramat	5	30	117	39	-9.90335
4	Benomyl	1	30	148	38.3704	-8.12904
	Benomyl	2	10	149	35.9655	-30.3098
	Benomyl	3	10	146	29.2	-5.79708
	Benomyl	4	40	125	29.1667	29.5491
	Benomyl	5	20	148	39.8462	-28.329
5	Chlorothalonil	1	10	146	34.0667	-23.4299
	Chlorothalonil	2	0	71	14.2	42.8342
	Chlorothalonil	3	20	107	25.8276	16.8194
	Chlorothalonil	4	50	75	21.875	55.9682
	Chlorothalonil	5	30	134	31.2667	11.8894
6	Copper	1	10	131	26.9706	2.2805
	Copper	2	20	113	27.2759	12.1551
	Copper	3	20	136	27.2	12.3994
	Copper	4	20	139	34.75	-11.9162
	Copper	5	10	151	30.2	-9.42026
7	Cyazophamid	1	20	151	31.0882	-0.123117
	Cyazophamid	2	40	120	36.5217	11.7833
	Cyazophamid	3	10	153	32.4545	-17.5889
	Cyazophamid	4	20	138	27.6	11.1111
	Cyazophamid	5	40	105	36.75	11.2319
8	Fluopicolide + Propamocarb hydrochloride	1	10	209	48.7667	-76.6908
	Fluopicolide + Propamocarb hydrochloride	2	40	96	33.6	18.8406
	Fluopicolide + Propamocarb hydrochloride	3	20	164	35.875	-15.5394
	Fluopicolide + Propamocarb hydrochloride	4	10	133	29.0938	-5.41211
	Fluopicolide + Propamocarb hydrochloride	5	30	126	38.3478	-8.06551
9	Penconazol	1	20	215	43	-38.4863
	Penconazol	2	30	162	35.4375	0.135894
	Penconazol	3	30	148	64.75	-82.4677
	Penconazol	4	30	168	42	-18.3575
	Penconazol	5	40	179	48.1923	-16.4065
10	Trifloxystrobin	1	10	147	29.4	-6.52171
	Trifloxystrobin	2	20	140	29.697	4.35761
	Trifloxystrobin	3	30	164	41	-15.5394
	Trifloxystrobin	4	30	116	27.0667	23.7252
	Trifloxystrobin	5	40	147	38.1111	7.9442

## Sheet: multiple exposure
		Replicate	%mortality	progeny	reproductive Capacity	reduction coefficient E%
1	Control	1	10	178	35.6
	Control	2	20	112	23.0588
	Control	3	0	190	38
	Control	4	10	104	26
	Control	5	20	111	22.2
2	Cypermethrin	1	100	0	0	100
	Cypermethrin	2	100	0	0	100
	Cypermethrin	3	100	0	0	100
	Cypermethrin	4	90	5	5	98.0388
	Cypermethrin	5	100	1	7	100
3	Pyriproxyfen	1	20	93	18.6	41.636
	Pyriproxyfen	2	20	109	27.25	14.4936
	Pyriproxyfen	3	30	143	31.2812	14.1136
	Pyriproxyfen	4	20	123	27.7742	12.8487
	Pyriproxyfen	5	10	151	30.2	-6.6085
4	Spirotetramat	1	10	144	30.5455	-7.82798
	Spirotetramat	2	0	178	35.6	-39.6344
	Spirotetramat	3	40	132	34.2222	19.4618
	Spirotetramat	4	20	99	23.1	27.5156
	Spirotetramat	5	0	211	42.2	-65.5217
5	Benomyl	1	20	150	30	5.86446
	Benomyl	2	40	157	36.6333	13.7875
	Benomyl	3	30	128	26.3529	27.6448
	Benomyl	4	20	145	33.8333	-6.16397
	Benomyl	5	30	115	23.6765	34.9934
6	Chlorothalonil	1	20	147	38.1111	-19.587
	Chlorothalonil	2	50	82	18.5161	63.687
	Chlorothalonil	3	30	92	20.125	44.7444
	Chlorothalonil	4	40	93	27.125	36.1643
	Chlorothalonil	5	20	141	28.2	11.5126
7	Copper	1	20	122	30.5	4.29553
	Copper	2	50	83	26.4091	48.2076
	Copper	3	40	159	48.3913	-13.8835
	Copper	4	10	137	27.4	3.27573
	Copper	5	30	169	34.7941	4.46858
8	Cyazophamid	1	10	114	27.5172	2.86186
	Cyazophamid	2	10	166	37.4839	-32.3212
	Cyazophamid	3	10	118	23.6	16.69
	Cyazophamid	4	10	156	31.2	-10.1386
	Cyazophamid	5	20	173	40.3667	-26.6646
9	Fluopicolide + Propamocarb hydrochloride	1	10	178	37.7576	-33.2874
	Fluopicolide + Propamocarb hydrochloride	2	0	190	38	-49.0479
	Fluopicolide + Propamocarb hydrochloride	3	10	168	39.2	-38.3792
	Fluopicolide + Propamocarb hydrochloride	4	20	138	30.1875	5.27611
	Fluopicolide + Propamocarb hydrochloride	5	0	212	42.4	-66.3061
10	Penconazol	1	20	167	33.4	-4.80423
	Penconazol	2	40	135	27	36.4585
	Penconazol	3	0	145	29	-13.7471
	Penconazol	4	0	152	30.4	-19.2384
	Penconazol	5	10	178	35.6	-25.6709
11	Trifloxystrobin	1	30	137	33.069	9.20519
	Trifloxystrobin	2	0	114	22.8	10.5712
	Trifloxystrobin	3	40	164	39.5862	6.83828
	Trifloxystrobin	4	40	109	31.7917	25.1819
	Trifloxystrobin	5	30	156	42	-15.316
